# Supplementary material for: FRoG—A New Calculation Engine for Clinical Investigations with Proton and Carbon Ion Beams at CNAO
Source: MDPI journal article supplement (doi:10.3390/cancers10110395), 2018-10-23
Supplement: s1 [file s1]

# Supplementary Materials: FROG – A New Calculation Engine for Clinical Investigations with Proton and Carbon Ion Beams at CNAO

KyungDon Choi, Stewart B Mein, Benedikt Kopp, Giuseppe Magro, Silvia Molinelli, Mario Ciocca and Andrea Mairani

**Table S1.** Average percent variation in  $D_{50}$ ,  $D_2$  and  $D_{98}$  of the target for FROG dose calculation with respect to MC for carbon ion patient cases. The values represent the mean  $\pm$  standard error of the mean.

| Percent Difference of | Total             | H&N               | Pelvic            |
|-----------------------|-------------------|-------------------|-------------------|
| $D_{50}$              | 1.58% $\pm$ 0.18% | 1.49% $\pm$ 0.32% | 1.67% $\pm$ 0.21% |
| $D_2$                 | 0.84% $\pm$ 0.32% | 0.73% $\pm$ 0.59% | 0.95% $\pm$ 0.36% |
| $D_{98}$              | 2.22% $\pm$ 0.29% | 2.61% $\pm$ 0.46% | 1.82% $\pm$ 0.26% |

A tabulated summary of  $D_{50}$ ,  $D_2$ , and  $D_{98}$  variation in the target, for FROG dose calculation with respect to MC for carbon ion patient cases, is reported in supplementary table S1.  $D_{50}$ ,  $D_2$ , and  $D_{98}$  represent the physical dose received by 50%, 2%, and 98% of the target volume in the cumulative dose-volume histogram (DVH), respectively. Average percent DVH differences between FLUKA simulation and FROG over the whole patient set were within ~1.6%, ~0.8% and ~2.2%, for  $D_{50}$ ,  $D_2$ , and  $D_{98}$ , respectively. The worsening of the agreement for  $D_{98}$  between FROG and FLUKA is due to the steep dose gradients in the physical dose distributions, making  $D_{98}$  a less robust metric in the evaluation of the target coverage. Averaging over the results for  $D_{50}$ ,  $D_2$ , and  $D_{98}$ , FLUKA and FROG physical dose predictions match within 1.6%.
